# Supplementary material for: Anionic and cationic copolymerized ionic liquid-grafted silica as a multifunctional stationary phase for reversed-phase chromatography
Source: Royal Society of Chemistry journal article supplement (doi:10.1039/c3ay41627e), 2013-10-29
Supplement: c3ay41627e.pdf [file c3ay41627e.pdf]

## Anionic and cationic copolymerized ionic liquid-grafted silica as multifunctional stationary phase for reversed-phase chromatography

Hongdeng Qiu,\*<sup>a</sup> Mingliang Zhang,<sup>a</sup> Jia Chen,<sup>a</sup> Tongnian Gu,<sup>a</sup> Makoto Takafuji<sup>b</sup> and Hirotaka Ihara\*<sup>b,c</sup>

<sup>a</sup> Key Laboratory of Chemistry of Northwestern Plant Resources and Key Laboratory for Natural Medicine of Gansu Province, Lanzhou Institute of Chemical Physics, Chinese Academy of Sciences, Lanzhou 730000, China. E-mail: [hdqiu@licp.cas.cn](mailto:hdqiu@licp.cas.cn)

<sup>b</sup> Department of Applied Chemistry and Biochemistry, Kumamoto University, 2-39-1 Kurokami, Kumamoto 860-8555, Japan.

<sup>c</sup> Kumamoto Institute for Photo-Electro Organics (Phoenix), Kumamoto 862-0901, Japan

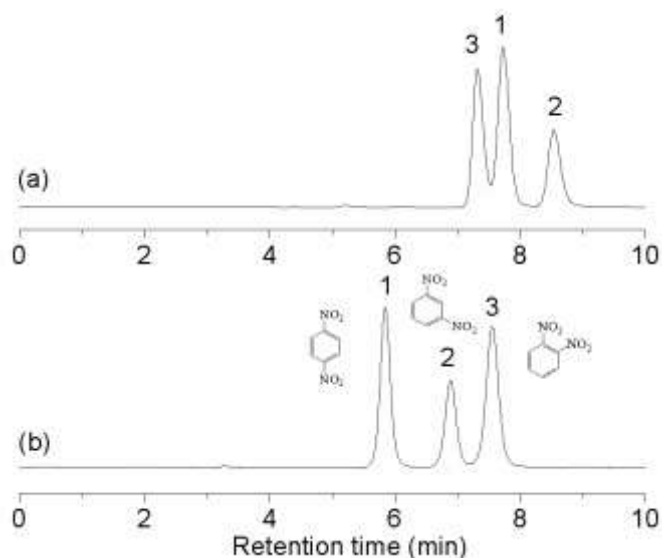

**Fig. S1** Separation of (1) *p*-dinitrobenzene, (2) *m*-dinitrobenzene and (3) *o*-dinitrobenzene with (a) C<sub>18</sub> and (b) Sil-P(ImC<sub>18</sub>-SS) columns. Mobile phase: 50% methanol. Other chromatographic conditions are the same as in Fig. 3.

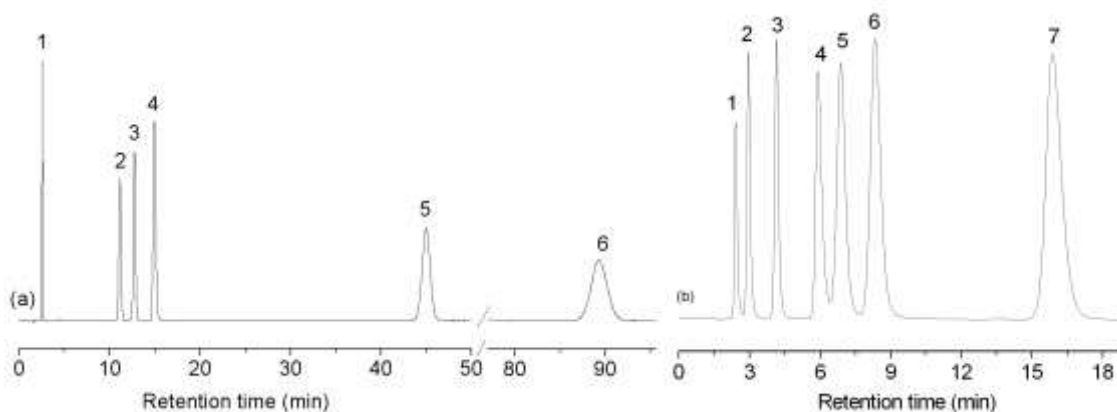

**Fig. S2** Separation of bases and nucleosides including (1) cytosine, (2) uridine, (3) thymine, (4) purine, (5) xanthosine, (6) adenosine and (7) theophylline with (a) C<sub>18</sub> and (b) Sil-P(ImC<sub>18</sub>-SS) columns using 200 mmol L<sup>-1</sup> KH<sub>2</sub>PO<sub>4</sub> as mobile phase at 30 °C. Theophylline was eluted after 165 min in this condition for C<sub>18</sub> column.

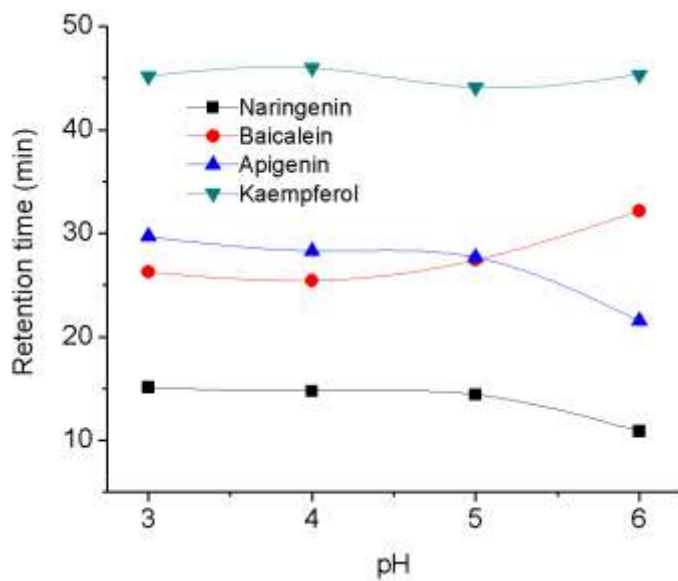

**Fig. S3** The effect of pH values of buffer on the retention of (1) naringenin, (2) baicalein, (3) apigenin, (4) kaempferol with Sil-P(ImC<sub>18</sub>-SS) column using 10 mmol L<sup>-1</sup> NaH<sub>2</sub>PO<sub>4</sub>: methanol= (40/60, v/v) as mobile phase.
